# Supplementary material for: Photolytic insertion of carbon monoxide into nitrosyl chloride: formation of nitrosoformyl chloride
Source: Royal Society of Chemistry journal article supplement (doi:10.1039/d2cp02913h), 2022-01-01
Supplement: d2cp02913h1.pdf [file d2cp02913h1.pdf]

## Supporting Information

### Photolytic Insertion of Carbon Monoxide into Nitrosyl Chloride: Formation of Nitrosoformyl Chloride

Bo Lu,<sup>a</sup> Xin Jiang<sup>a</sup> and Xiaoqing Zeng<sup>\*a</sup>

<sup>a</sup>Department of Chemistry, Shanghai Key Laboratory of Molecular Catalysts and Innovative Materials, Fudan University, Shanghai 200433, China.

E-mail: xqzeng@fudan.edu.cn

## Table of Contents

|                                                                              |     |
|------------------------------------------------------------------------------|-----|
| Matrix-isolation IR spectra (Figures S1-S4).....                             | S3  |
| 2D relaxed potential energy scan graph of ClC(O)NO (Figure S5).....          | S7  |
| Calculated IR data of different ClC(O)NO isomers (Table S1).....             | S8  |
| Calculated <sup>37</sup> Cl shifts of <i>trans</i> -ClC(O)NO (Table S2)..... | S9  |
| Calculated vertical transitions of ClC(O)NO (Table S3).....                  | S10 |
| Calculated atomic coordinates and energies for all optimized structures..... | S11 |

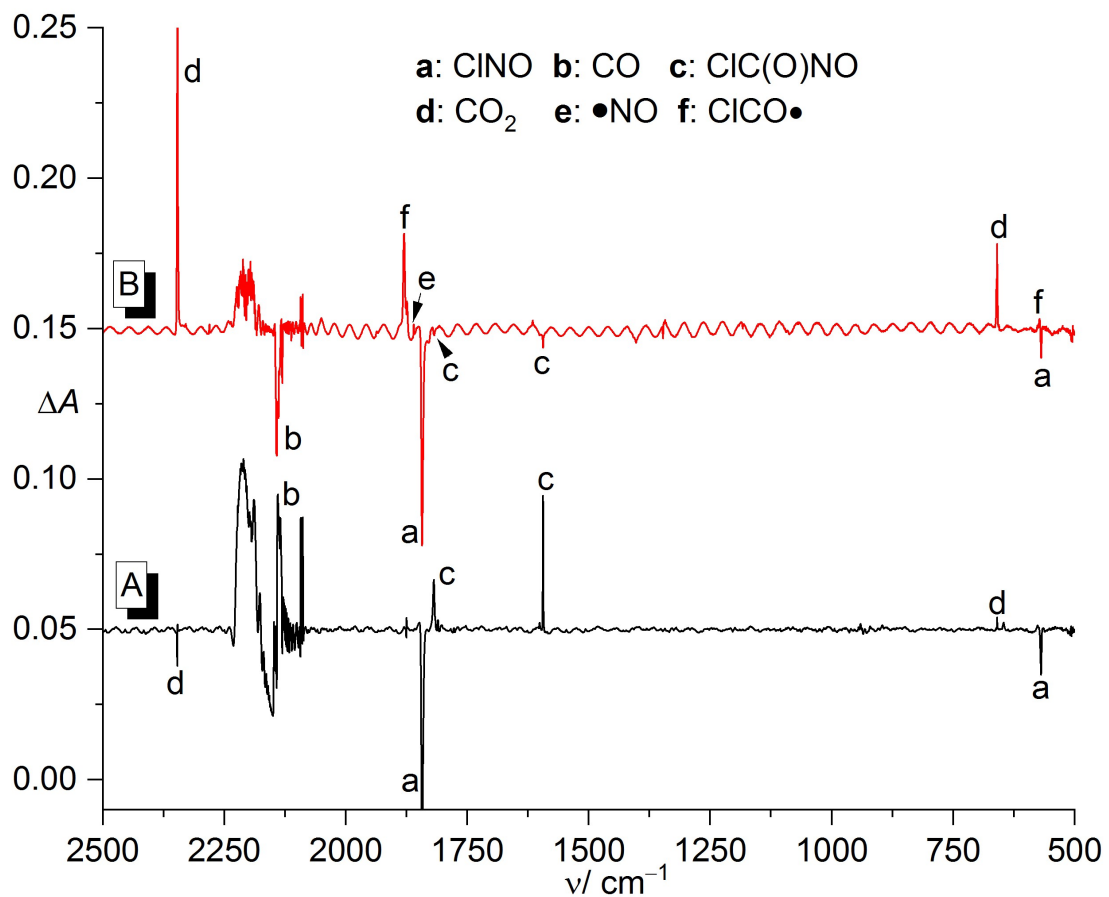

**Fig. S1** (A) IR difference spectrum reflecting the changes of the CINO/CO (1 : 1000) mixture upon irradiation upon 266 nm (5 min) at 20 K. (B) IR difference spectrum reflecting the change of the same matrix upon subsequent irradiation at 193 nm (10 min).

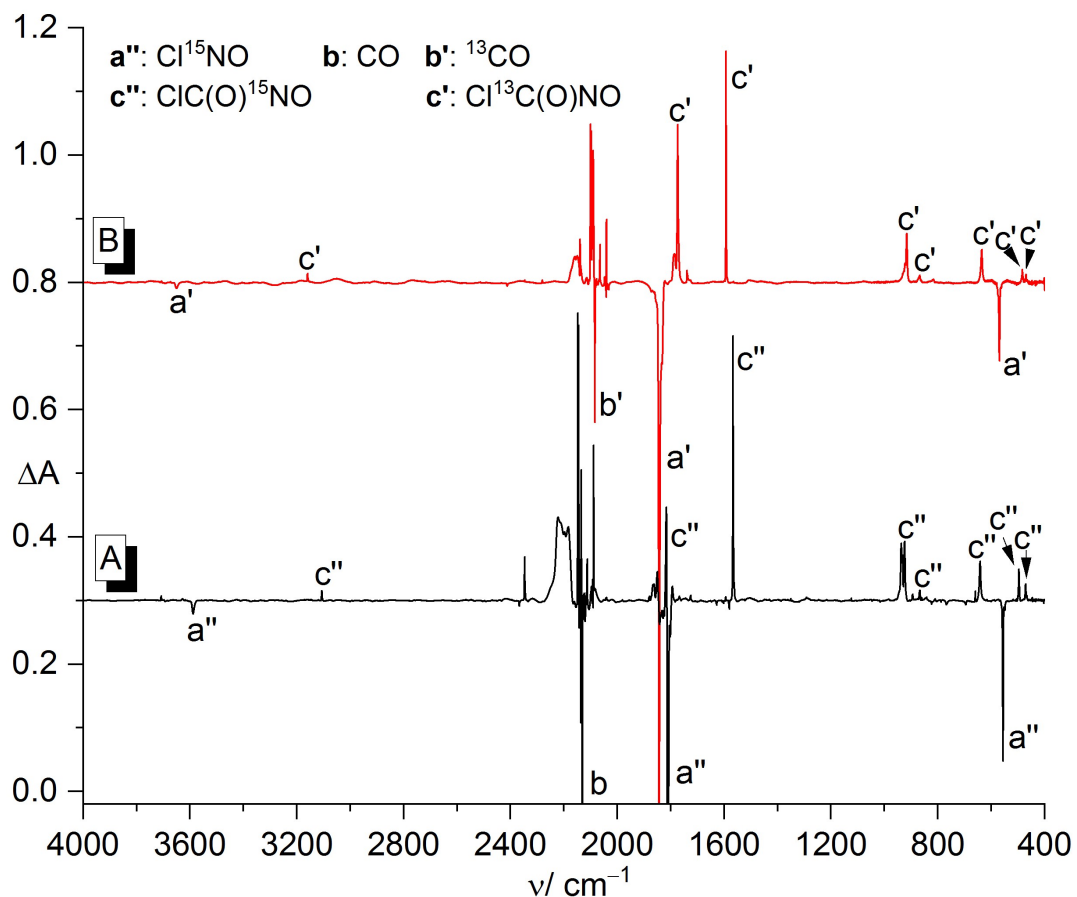

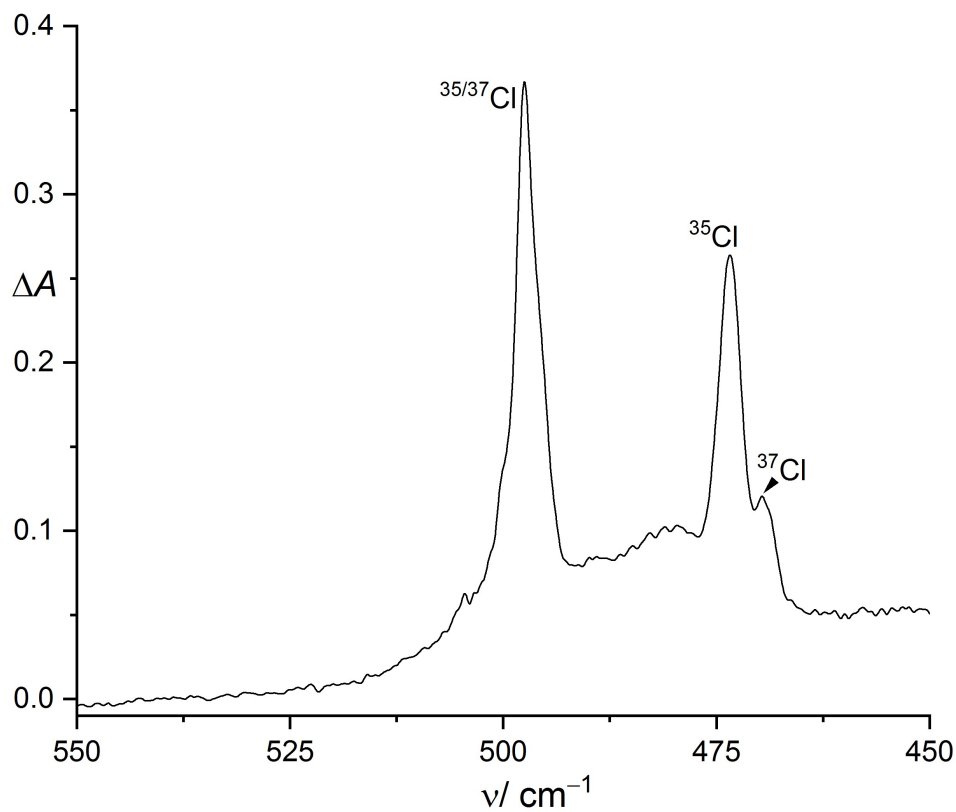

**Fig. S3** Part of the IR spectrum for the two IR bands of  $\text{ClC(O)NO}$  in the range of 550–450  $\text{cm}^{-1}$ . The most prominent bands of  $^{35/37}\text{Cl}$  isotopomer is indicated.

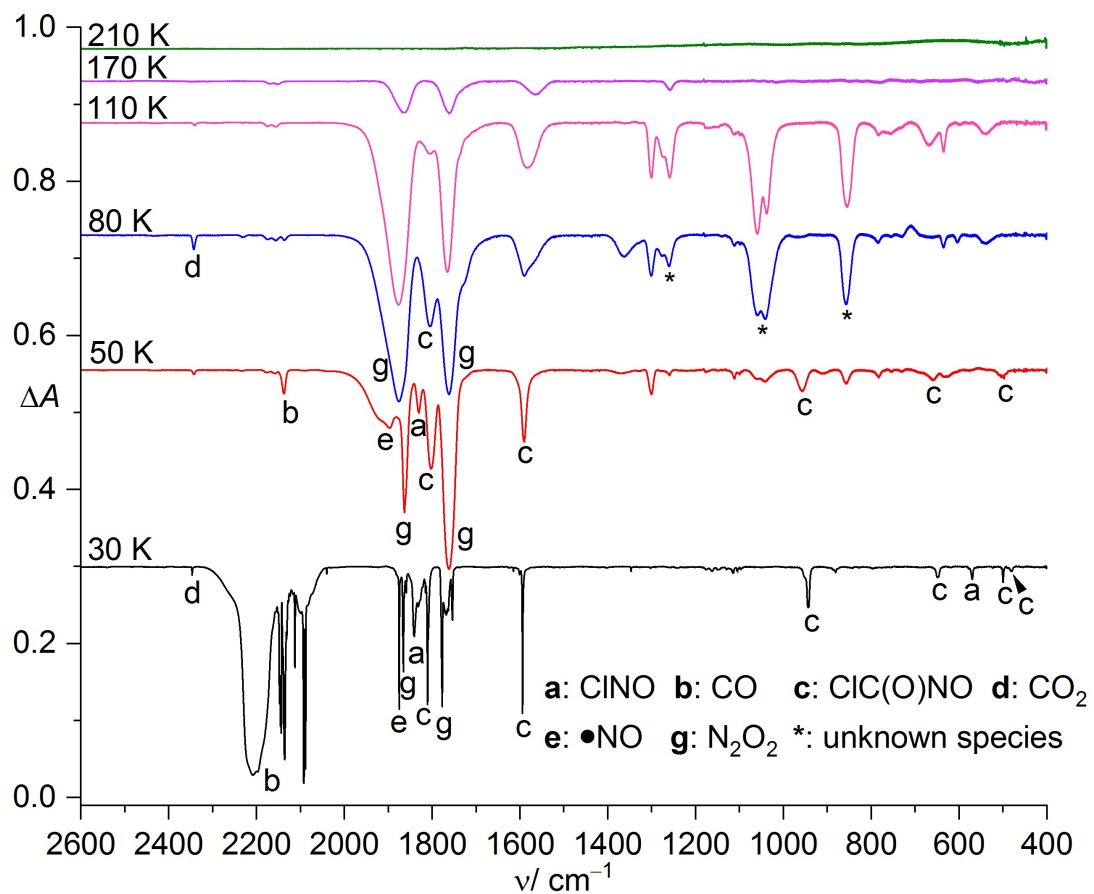

**Fig. S4** IR spectra of the photolysis products of ClNO in solid CO at different temperatures.

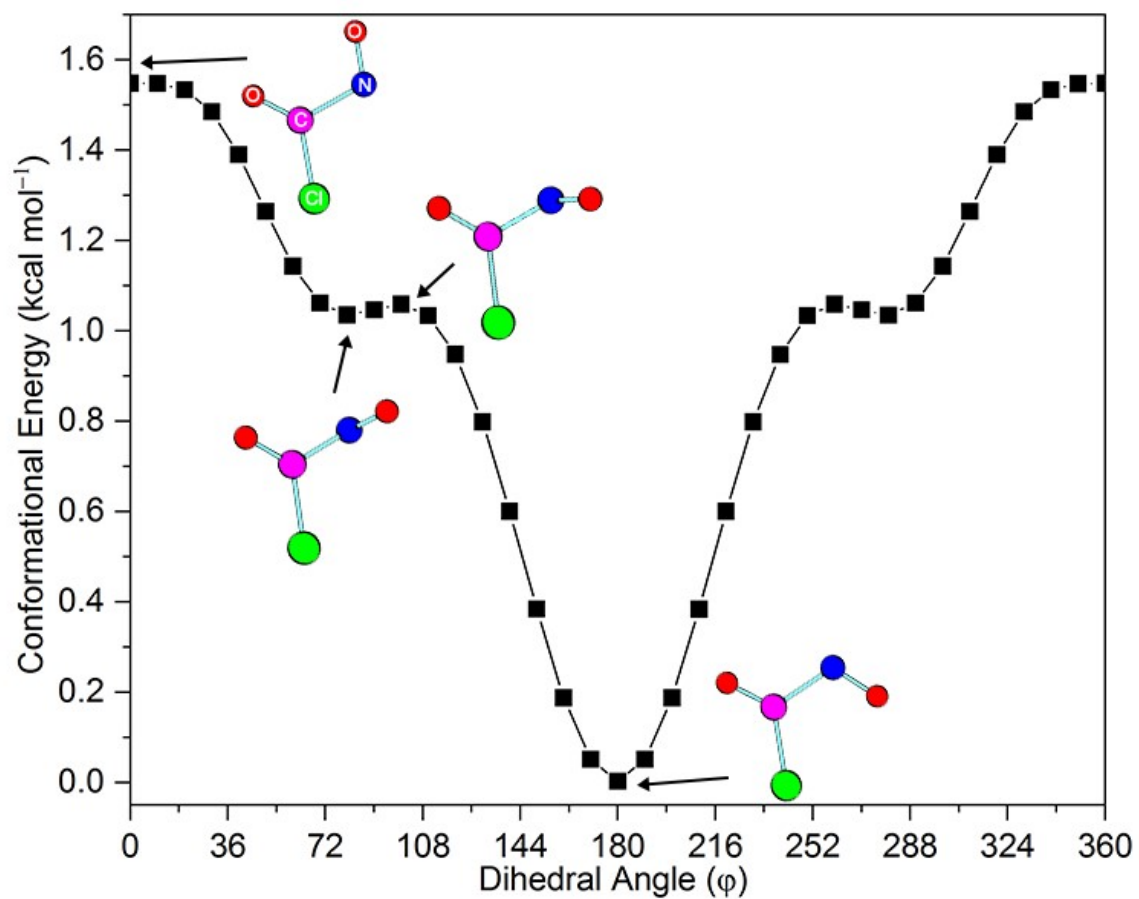

**Fig. S5** Relaxed potential energy scan graph of ClC(O)NO. The calculations were fully relaxed simulations, with geometry optimisations at each fixed dihedral at a scan rate of 10 degrees in 36 steps to cover the entire 360 degrees at the B3LYP/6-311+G(3df) level.

**Table S1.** B3LYP/6-311+G(3df) calculated IR frequencies ( $> 400 \text{ cm}^{-1}$ ) and intensities ( $\text{km mol}^{-1}$ , in parentheses) of CIC(O)NO and its isomers.

| <i>trans</i> -CIC(O)NO |            | <i>cis</i> -CIC(O)NO |            | non-planar CIC(O)NO |            | CIONCO     | CIC(O)ON   | CICNO <sub>2</sub> | CICNOO    |
|------------------------|------------|----------------------|------------|---------------------|------------|------------|------------|--------------------|-----------|
| normal                 | guess=mix  | normal               | guess=mix  | normal              | guess=mix  |            |            |                    |           |
| 1890 (328)             | 1889 (328) | 1894 (302)           | 1888 (299) | 1874 (350)          | 1874 (351) | 2238 (948) | 1954 (611) | 1589 (298)         | 1730 (39) |
| 1713 (152)             | 1684 (152) | 1718 (207)           | 1679 (202) | 1659 (135)          | 1659 (135) | 1310 (39)  | 1858 (546) | 1389 (90)          | 1044 (90) |
| 909 (127)              | 854 (127)  | 891 (245)            | 884 (609)  | 850 (137)           | 851 (135)  | 854 (16)   | 707 (396)  | 956 (49)           | 943 (17)  |
| 633 (51)               | 620 (51)   | 699 (14)             | 609 (9)    | 825 (67)            | 824 (64)   | 701 (26)   | 532 (< 1)  | 844 (52)           | 689 (146) |
| 495 (17)               | 498 (17)   | 466 (17)             | 470 (16)   | 503 (65)            | 504 (64)   | 621 (32)   | 404 (31)   | 752 (65)           | 584 (249) |
| 462 (34)               | 444 (34)   | 461 (16)             | 467 (16)   | 423 (5)             | 423 (5)    | 588 (17)   |            | 563 (4)            | 431 (81)  |



**Table S2.** Calculated  $^{35/37}\text{Cl}$  isotopic shifts of *trans*-ClC(O)NO.

| B3LYP <sup>a</sup>  | Obs <sup>b</sup>  | $\Delta\nu(^{35/37}\text{Cl})$ | Mode <sup>d</sup>                                    |
|---------------------|-------------------|--------------------------------|------------------------------------------------------|
| $\nu_{\text{harm}}$ | matrix            | Cal <sup>c</sup>               |                                                      |
| 1890 (328)          | 1818.8 (vs)       | 0.0                            | A', $\nu_1$ , $\nu(\text{CO})$                       |
| 1713 (152)          | 1594.0 (vs)       | 0.0                            | A', $\nu_2$ , $\nu(\text{NO})$                       |
| 909 (127)           | 940.3 (s)         | 0.2                            | A', $\nu_3$ , $\nu(\text{CN})$                       |
| 633 (51)            | 646.4 (m)         | 0.1                            | A', $\nu_4$ , $\delta_{\text{i.p.}}(\text{CNO})$     |
| 495 (17)            | 497.5 (m)         | 0.1                            | A'', $\nu_5$ , $\delta_{\text{o.o.p.}}(\text{ClCO})$ |
| 462 (34)            | 473.4 (vw)        | 4.9                            | A', $\nu_6$ , $\nu(\text{CCl})$                      |
| 399 (14)            | n.o. <sup>e</sup> | 1.7                            | A', $\nu_7$ , $\delta_{\text{i.p.}}(\text{OCN})$     |
| 233 (< 1)           | n.o.              | 2.5                            | A', $\nu_8$ , $\delta_{\text{i.p.}}(\text{ClCN})$    |
| 81 (1)              | n.o.              | 0.1                            | A'', $\nu_9$ , $\tau(\text{OCNO})$                   |

<sup>a</sup>B3LYP/6-311+G(3df) calculated IR frequencies and intensities ( $\text{km mol}^{-1}$ , in parentheses). <sup>b</sup>Observed band positions in CO-matrix and the relative intensities (vs: very strong, s: strong, m: medium, w: weak, vw: very weak). <sup>c</sup>Isotopic shifts calculated at the B3LYP/6-311+G(3df) level. <sup>d</sup>Assignment of the vibrational modes based on the calculated vibrational displacement vectors at the B3LYP/6-311+G(3df) level. <sup>e</sup>The abbreviation "n.o." denotes "not observed".

**Table S3.** TD B3LYP/6-311+G(3df) calculated vertical transitions of ClC(O)NO.

| <i>trans</i>   |                                     | <i>cis</i>     |                                     | non-planar     |                                     |
|----------------|-------------------------------------|----------------|-------------------------------------|----------------|-------------------------------------|
| energy<br>(nm) | oscillator<br>strength ( <i>f</i> ) | energy<br>(nm) | oscillator<br>strength ( <i>f</i> ) | energy<br>(nm) | oscillator<br>strength ( <i>f</i> ) |
| 307            | 0.0050                              | 946            | 0.0002                              | 307            | 0.0050                              |
| 254            | 0.0125                              | 303            | 0.0001                              | 253            | 0.0125                              |
| 243            | 0.0026                              | 260            | 0.0001                              | 243            | 0.0025                              |
| 225            | 0.0005                              | 259            | 0.0146                              | 225            | 0.0005                              |
| 207            | 0.0955                              | 246            | 0.0003                              | 207            | 0.0955                              |
| 204            | 0.0016                              | 202            | 0.1565                              | 204            | 0.0017                              |
| 180            | 0.0081                              | 180            | 0.0224                              | 180            | 0.0080                              |
| 178            | 0.0055                              | 172            | 0.0008                              | 178            | 0.0053                              |
| 177            | 0.0020                              | 163            | 0.0656                              | 177            | 0.0020                              |

## Calculated atomic coordinates and energies for all optimized structures

### *trans*-ClC(O)NO

B3LYP/6-311+G(3df)

|    |             |             |            |
|----|-------------|-------------|------------|
| O  | 1.53844100  | -1.09552400 | 0.00000000 |
| N  | 1.48150100  | 0.07806900  | 0.00000000 |
| C  | 0.00000000  | 0.64562600  | 0.00000000 |
| Cl | -1.25472400 | -0.59415900 | 0.00000000 |
| O  | -0.16846600 | 1.80558200  | 0.00000000 |

|                                              |             |
|----------------------------------------------|-------------|
| Zero-point correction=                       | 0.015312    |
| Thermal correction to Energy=                | 0.020556    |
| Thermal correction to Enthalpy=              | 0.021500    |
| Thermal correction to Gibbs Free Energy=     | -0.014539   |
| Sum of electronic and zero-point Energies=   | -703.505236 |
| Sum of electronic and thermal Energies=      | -703.499992 |
| Sum of electronic and thermal Enthalpies=    | -703.499048 |
| Sum of electronic and thermal Free Energies= | -703.535087 |

### *cis*-ClC(O)NO

B3LYP/6-311+G(3df)

|    |             |             |            |
|----|-------------|-------------|------------|
| O  | 2.17409800  | -0.36023000 | 0.00000000 |
| N  | 1.09203100  | -0.81731000 | 0.00000000 |
| C  | 0.00000000  | 0.37465800  | 0.00000000 |
| Cl | -1.59889900 | -0.33864400 | 0.00000000 |
| O  | 0.26803500  | 1.51400200  | 0.00000000 |

|                                              |             |
|----------------------------------------------|-------------|
| Zero-point correction=                       | 0.015268    |
| Thermal correction to Energy=                | 0.020589    |
| Thermal correction to Enthalpy=              | 0.021534    |
| Thermal correction to Gibbs Free Energy=     | -0.015659   |
| Sum of electronic and zero-point Energies=   | -703.504466 |
| Sum of electronic and thermal Energies=      | -703.499144 |
| Sum of electronic and thermal Enthalpies=    | -703.498199 |
| Sum of electronic and thermal Free Energies= | -703.535392 |

### non-planar ClC(O)NO

B3LYP/6-311+G(3df)

|    |             |             |             |
|----|-------------|-------------|-------------|
| O  | 1.90071500  | -0.68795300 | -0.34539800 |
| N  | 1.18563600  | -0.32531100 | 0.53246800  |
| C  | 0.01389400  | 0.50816900  | 0.06019500  |
| Cl | -1.41810300 | -0.50816000 | -0.03624700 |
| O  | 0.06490200  | 1.67131300  | -0.08863400 |

|                                              |             |
|----------------------------------------------|-------------|
| Zero-point correction=                       | 0.015314    |
| Thermal correction to Energy=                | 0.020557    |
| Thermal correction to Enthalpy=              | 0.021501    |
| Thermal correction to Gibbs Free Energy=     | -0.014530   |
| Sum of electronic and zero-point Energies=   | -703.505234 |
| Sum of electronic and thermal Energies=      | -703.499991 |
| Sum of electronic and thermal Enthalpies=    | -703.499047 |
| Sum of electronic and thermal Free Energies= | -703.535078 |

#### CICNOO

B3LYP/6-311+G(3df)

|    |             |             |             |
|----|-------------|-------------|-------------|
| C  | -0.44132100 | 0.08315200  | 0.43744100  |
| Cl | -2.01120800 | -0.13743500 | -0.07433800 |
| N  | 0.53459100  | 0.54222100  | -0.13609100 |
| O  | 1.82192200  | 0.50048800  | -0.01802600 |
| O  | 2.31511900  | -0.74524600 | -0.03300700 |

|                                              |             |
|----------------------------------------------|-------------|
| Zero-point correction=                       | 0.013655    |
| Thermal correction to Energy=                | 0.018888    |
| Thermal correction to Enthalpy=              | 0.019832    |
| Thermal correction to Gibbs Free Energy=     | -0.015595   |
| Sum of electronic and zero-point Energies=   | -703.316524 |
| Sum of electronic and thermal Energies=      | -703.311291 |
| Sum of electronic and thermal Enthalpies=    | -703.310346 |
| Sum of electronic and thermal Free Energies= | -703.345773 |

#### CIONCO

B3LYP/6-311+G(3df)

|    |             |             |             |
|----|-------------|-------------|-------------|
| N  | 0.59142800  | -0.69605800 | -0.43220000 |
| C  | 1.54746200  | -0.00705600 | -0.04968300 |
| O  | 2.53828400  | 0.55826900  | 0.13007300  |
| O  | -0.54186700 | -0.80154300 | 0.37446500  |
| Cl | -1.72918200 | 0.40358500  | -0.04193000 |

|                                              |             |
|----------------------------------------------|-------------|
| Zero-point correction=                       | 0.015724    |
| Thermal correction to Energy=                | 0.020838    |
| Thermal correction to Enthalpy=              | 0.021783    |
| Thermal correction to Gibbs Free Energy=     | -0.014007   |
| Sum of electronic and zero-point Energies=   | -703.464772 |
| Sum of electronic and thermal Energies=      | -703.459658 |
| Sum of electronic and thermal Enthalpies=    | -703.458714 |
| Sum of electronic and thermal Free Energies= | -703.494504 |

#### CICNO<sub>2</sub>

## B3LYP/6-311+G(3df)

|    |             |             |             |
|----|-------------|-------------|-------------|
| C  | 0.28385400  | -0.00198000 | 0.85666100  |
| Cl | 1.60565600  | 0.00029400  | -0.17405900 |
| N  | -0.93029200 | 0.00019200  | 0.06821900  |
| O  | -1.40520200 | 1.09449400  | -0.16547800 |
| O  | -1.40570200 | -1.09380200 | -0.16683400 |

|                                              |             |
|----------------------------------------------|-------------|
| Zero-point correction=                       | 0.015291    |
| Thermal correction to Energy=                | 0.020187    |
| Thermal correction to Enthalpy=              | 0.021131    |
| Thermal correction to Gibbs Free Energy=     | -0.013534   |
| Sum of electronic and zero-point Energies=   | -703.386346 |
| Sum of electronic and thermal Energies=      | -703.381451 |
| Sum of electronic and thermal Enthalpies=    | -703.380507 |
| Sum of electronic and thermal Free Energies= | -703.415172 |

## TS1

## B3LYP/6-311+G(3df)

|    |             |             |             |
|----|-------------|-------------|-------------|
| O  | -1.80724800 | -0.77916600 | -0.33702000 |
| N  | -1.26280900 | -0.15987500 | 0.51840200  |
| C  | -0.00265300 | 0.54758700  | 0.05266400  |
| Cl | 1.35908100  | -0.56381900 | -0.01132600 |
| O  | 0.02614900  | 1.70648100  | -0.13201100 |

|                                              |             |
|----------------------------------------------|-------------|
| Zero-point correction=                       | 0.015207    |
| Thermal correction to Energy=                | 0.019605    |
| Thermal correction to Enthalpy=              | 0.020549    |
| Thermal correction to Gibbs Free Energy=     | -0.013075   |
| Sum of electronic and zero-point Energies=   | -703.505305 |
| Sum of electronic and thermal Energies=      | -703.500907 |
| Sum of electronic and thermal Enthalpies=    | -703.499963 |
| Sum of electronic and thermal Free Energies= | -703.533587 |

## TS2

## B3LYP/6-311+G(3df)

|    |             |             |             |
|----|-------------|-------------|-------------|
| O  | -2.04314300 | -0.46815600 | -0.31758800 |
| N  | -1.27109400 | -0.32749900 | 0.47847600  |
| C  | 0.63487800  | -0.86860600 | 0.02845800  |
| Cl | 0.49714700  | 1.33325500  | -0.02859500 |
| O  | 1.62275400  | -1.42699400 | -0.06165800 |

|                        |          |
|------------------------|----------|
| Zero-point correction= | 0.013575 |
|------------------------|----------|

|                                              |             |
|----------------------------------------------|-------------|
| Thermal correction to Energy=                | 0.018990    |
| Thermal correction to Enthalpy=              | 0.019935    |
| Thermal correction to Gibbs Free Energy=     | -0.016084   |
| Sum of electronic and zero-point Energies=   | -703.478202 |
| Sum of electronic and thermal Energies=      | -703.472787 |
| Sum of electronic and thermal Enthalpies=    | -703.471843 |
| Sum of electronic and thermal Free Energies= | -703.507861 |

TS3

B3LYP/6-311+G(3df)

|    |             |             |             |
|----|-------------|-------------|-------------|
| O  | 1.91348800  | -0.86838400 | -0.10915800 |
| N  | 1.01411600  | -0.12657700 | 0.09451900  |
| C  | -0.14881100 | 0.22216300  | 0.52055200  |
| Cl | -1.66078600 | -0.21006400 | -0.09198300 |
| O  | 0.83993900  | 1.25890300  | -0.16849500 |

|                                              |             |
|----------------------------------------------|-------------|
| Zero-point correction=                       | 0.014609    |
| Thermal correction to Energy=                | 0.018955    |
| Thermal correction to Enthalpy=              | 0.019899    |
| Thermal correction to Gibbs Free Energy=     | -0.013584   |
| Sum of electronic and zero-point Energies=   | -703.368145 |
| Sum of electronic and thermal Energies=      | -703.363799 |
| Sum of electronic and thermal Enthalpies=    | -703.362855 |
| Sum of electronic and thermal Free Energies= | -703.396337 |
